**Proteomics of hyposaline stress in blue mussel congeners (genus *Mytilus*): implications for biogeographic range limits in response to climate change**

Lars Tomanek\*, Marcus J. Zuzow, Lauren Hitt, Loredana Serafini and  
Jacob J. Valenzuela

**SUPPLEMENTAL MATERIAL**

California Polytechnic State University  
Department of Biological Sciences  
Center for Coastal Marine Science  
Environmental Proteomics Laboratory  
1 Grand Ave.  
San Luis Obispo, CA 93407-0401  
U.S.A.

\* Author for correspondence:

E-mail: [ltomanek@calpoly.edu](mailto:ltomanek@calpoly.edu)

Phone: 1-805-756-2437

Fax: 1-805-756-1419

## Figure legends:

**Figure S1:** Principal component analysis of hyposaline treatments for (A) *M. trossulus* and (B) *M. galloprovincialis*, using proteins that were significant for the interaction effect between salinity and time of recovery (two-way ANOVA). Each symbol represents a mussel treated to a different salinity (for 4 h) without (0 h) and with a 24 h recovery at 1000 mOsm/kg. In each panel the horizontal axis represents PC1, and the vertical axis represents PC2. Percentages represent the proportion of total variation in the dataset described by each component. For matching positive and negative protein loadings (above or below  $\pm 1.0$  only) of the two main effects (salinity and time of recovery; see also PCAs of the main effects in Figs 2 and 3 in the paper) and the interaction effect of proteins contributing to PC1 and PC2 see Figs S2-S4. For a more detailed description of the role of positive and negative loadings see the publication by Fields et al. (2012).

**Figure S2:** Hierarchical clustering using Pearson's correlation of protein spots from (A) *Mytilus trossulus* and (B) *M. galloprovincialis* that changed significantly with hyposaline stress (salinity main effect only) and were identified with tandem mass spectrometry. Blue coloring represents a lower than average protein abundance (standardized volume), whereas orange represents greater than average protein abundance. The columns show individual mussels, which cluster according to treatment ( $N= 4-6$  for each treatment for *M. trossulus* and  $N=6$  for *M. galloprovincialis*). The rows represent the standardized protein abundances, which are identified to the right. Clusters talked about in the text are labeled for species (T versus G), main effect (S=salinity), and cluster (starting with A). Clusters do not adhere to specific criteria other than that they show similar changes in

protein abundance. Positive and negative loadings (above or below 1) for PC1 and PC2 as well as putative protein functions are given in columns to the right of the protein identifications.

**Figure S3:** Hierarchical clustering of protein spots from (A) *Mytilus trossulus* and (B) *M. galloprovincialis* that changed significantly with hyposaline stress (time during recovery main effect only). For further details see Fig S2.

**Figure S4:** Hierarchical clustering of protein spots from (A) *Mytilus trossulus* and (B) *M. galloprovincialis* that changed significantly during recovery from hyposaline stress (salinity and time of recovery interaction effect). For further details see Fig. S2.

Fig. S1

(A) *M. trossulus*

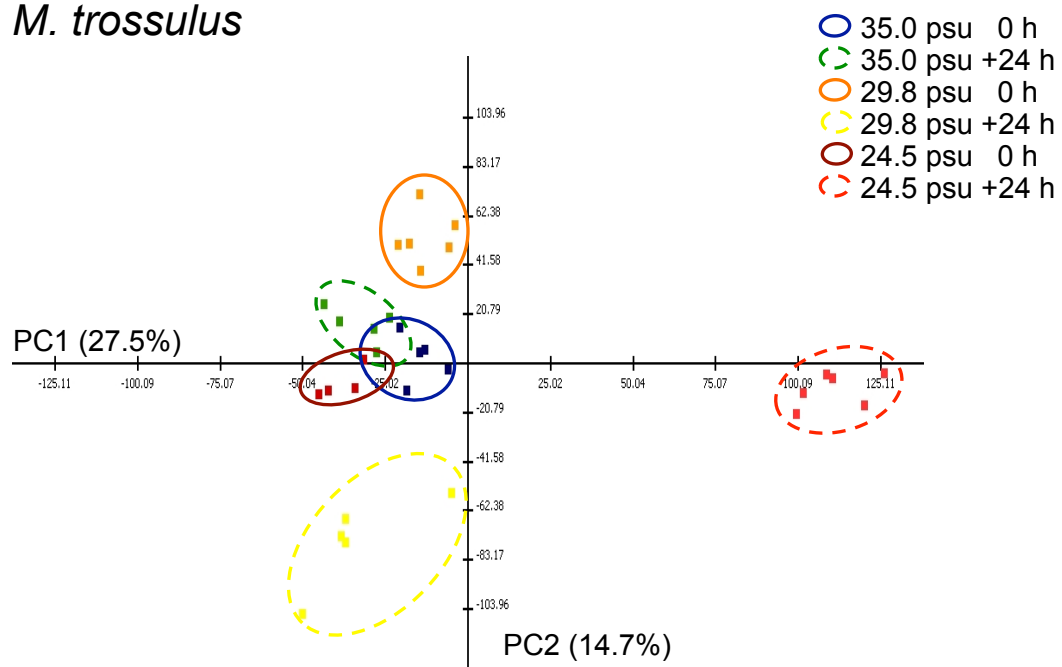

(B) *M. galloprovincialis*

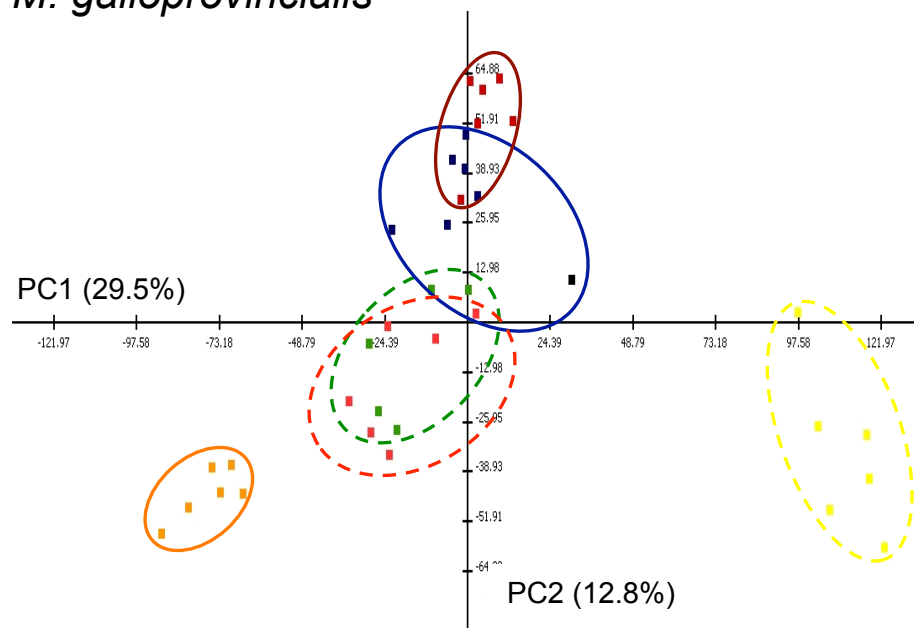

Fig. S2A

(A) *M. trossulus*- Salinity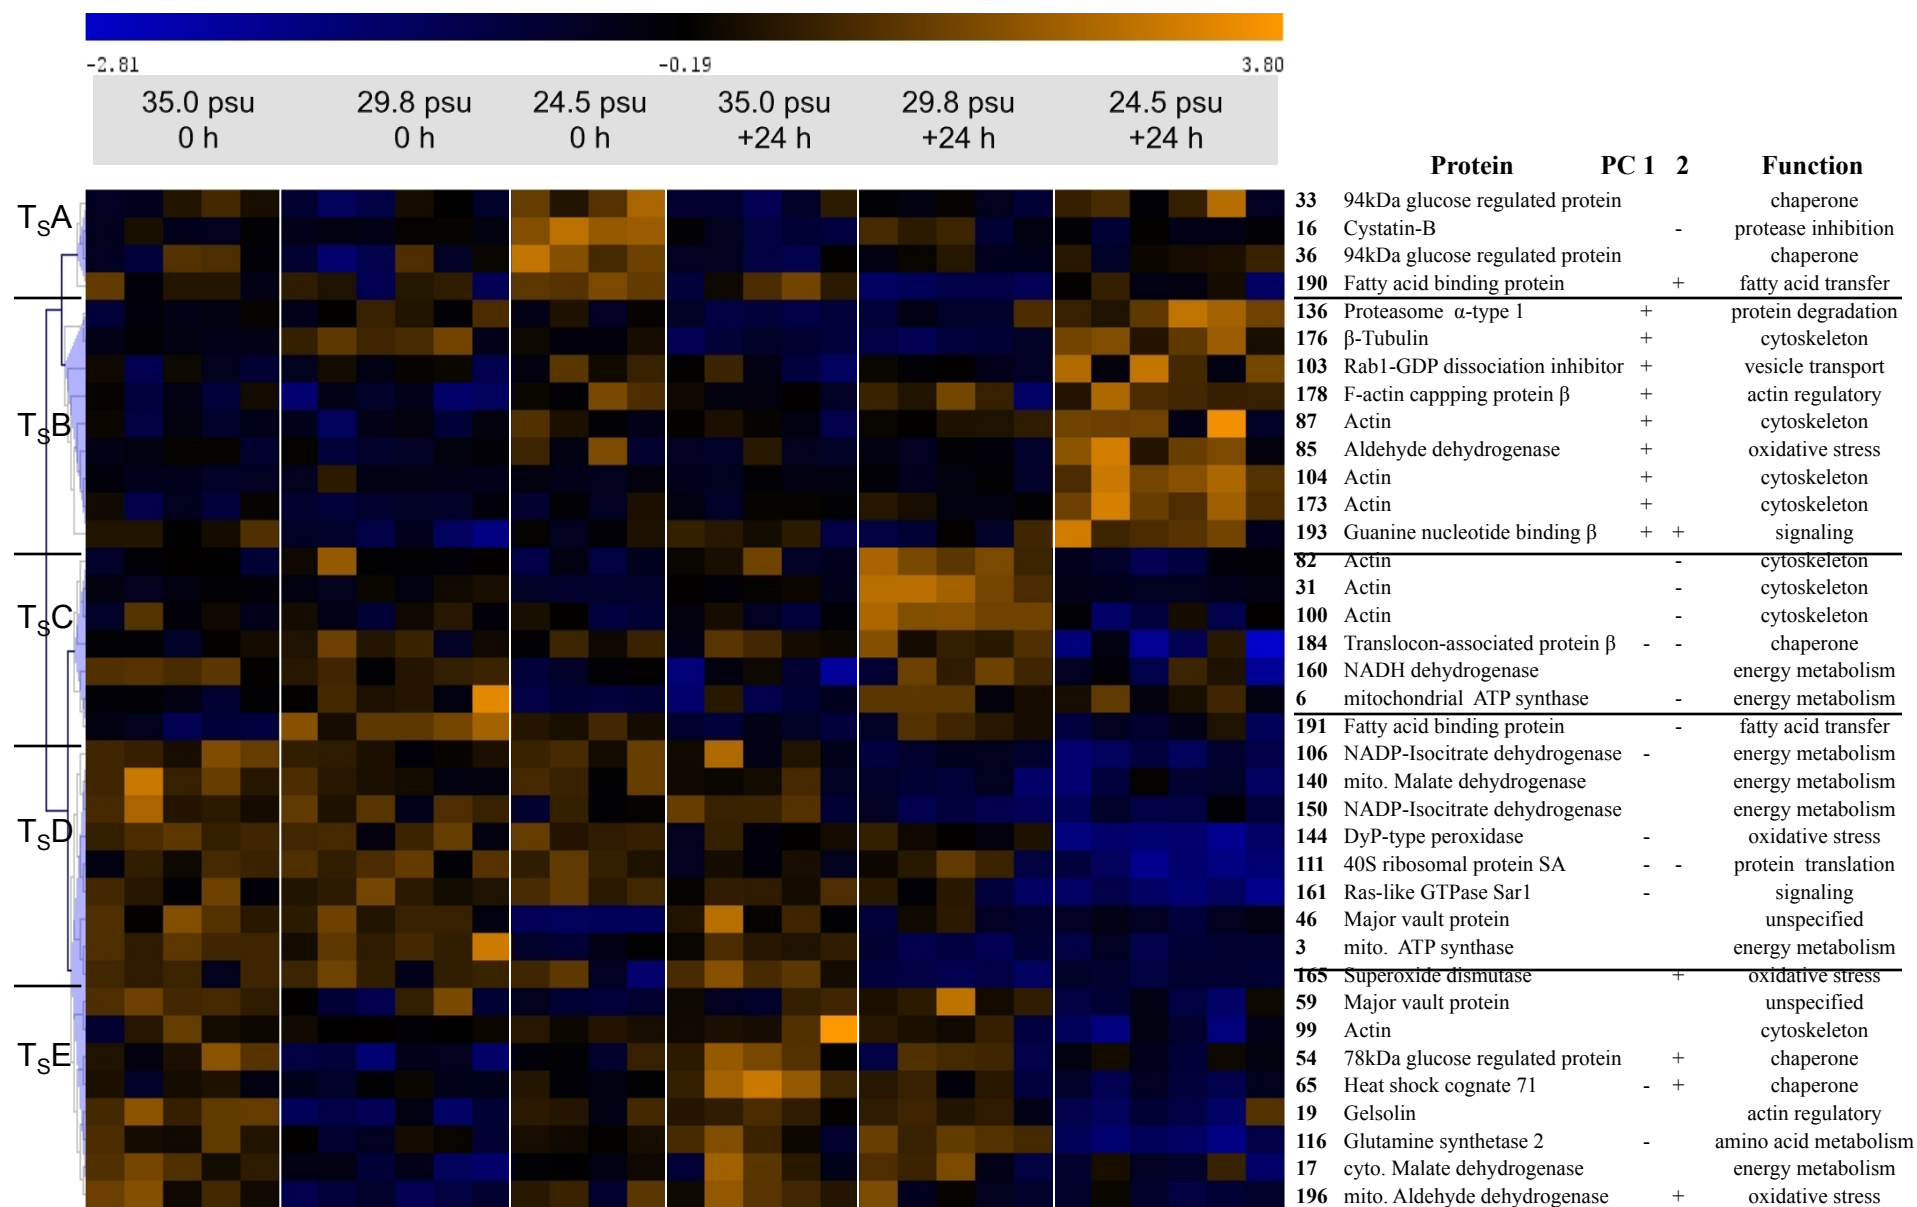

Fig. S2B

(B) *M. galloprovincialis* - Salinity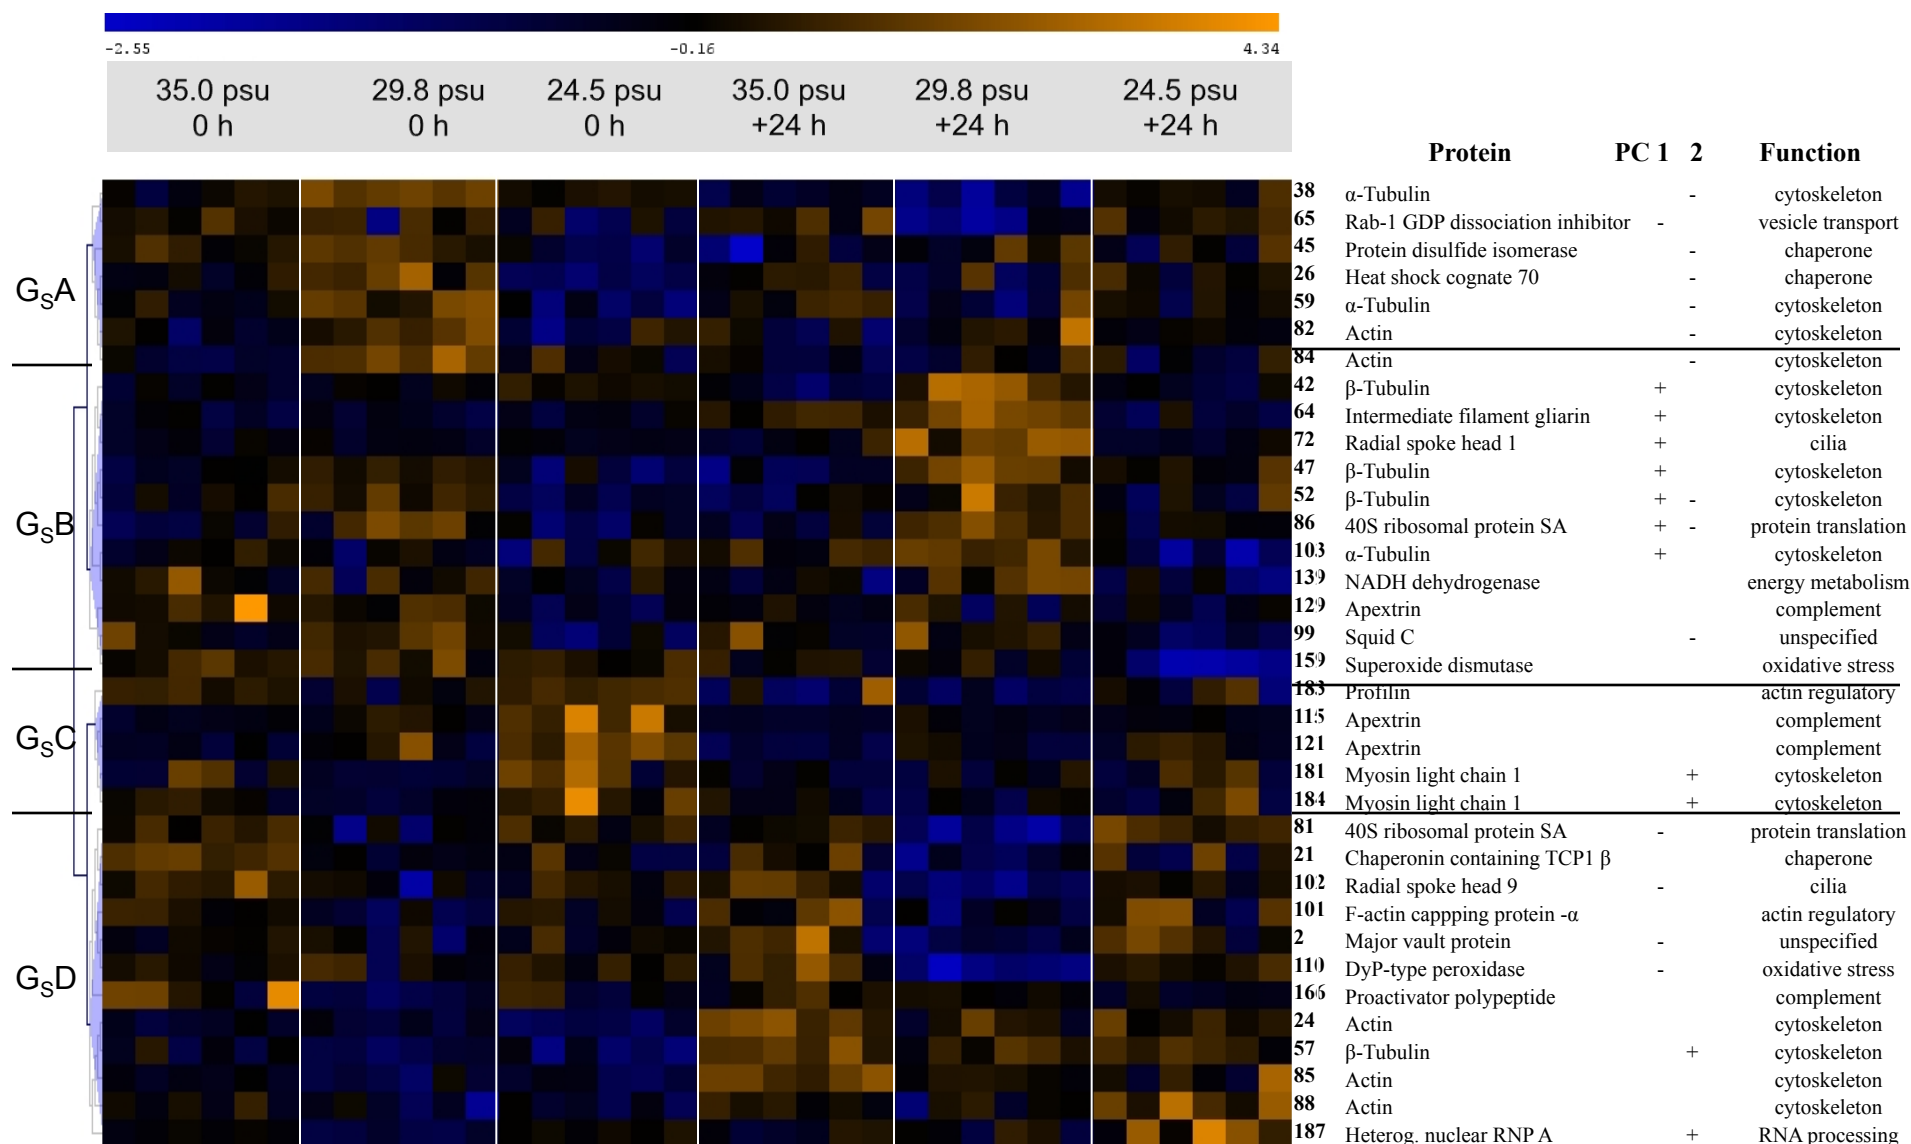

Fig. S3A

(A) *M. trossulus*- Recovery

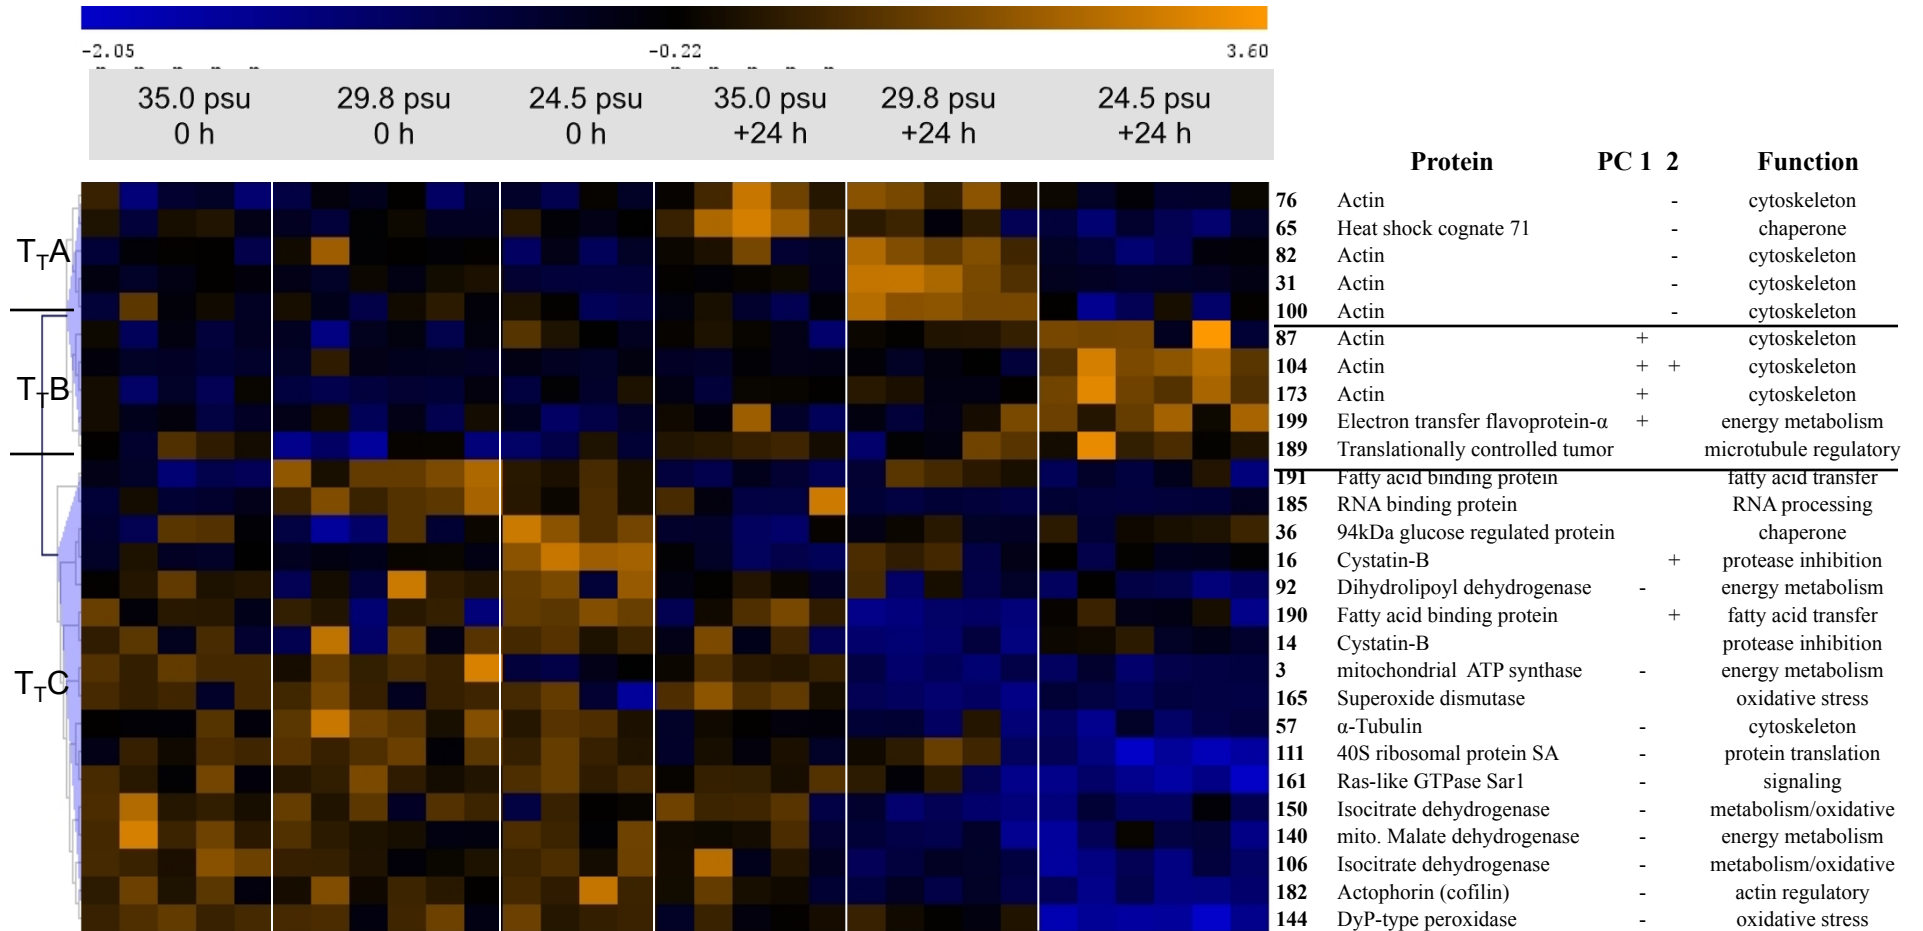

(B) *M. galloprovincialis* - Recovery

Fig. S3B

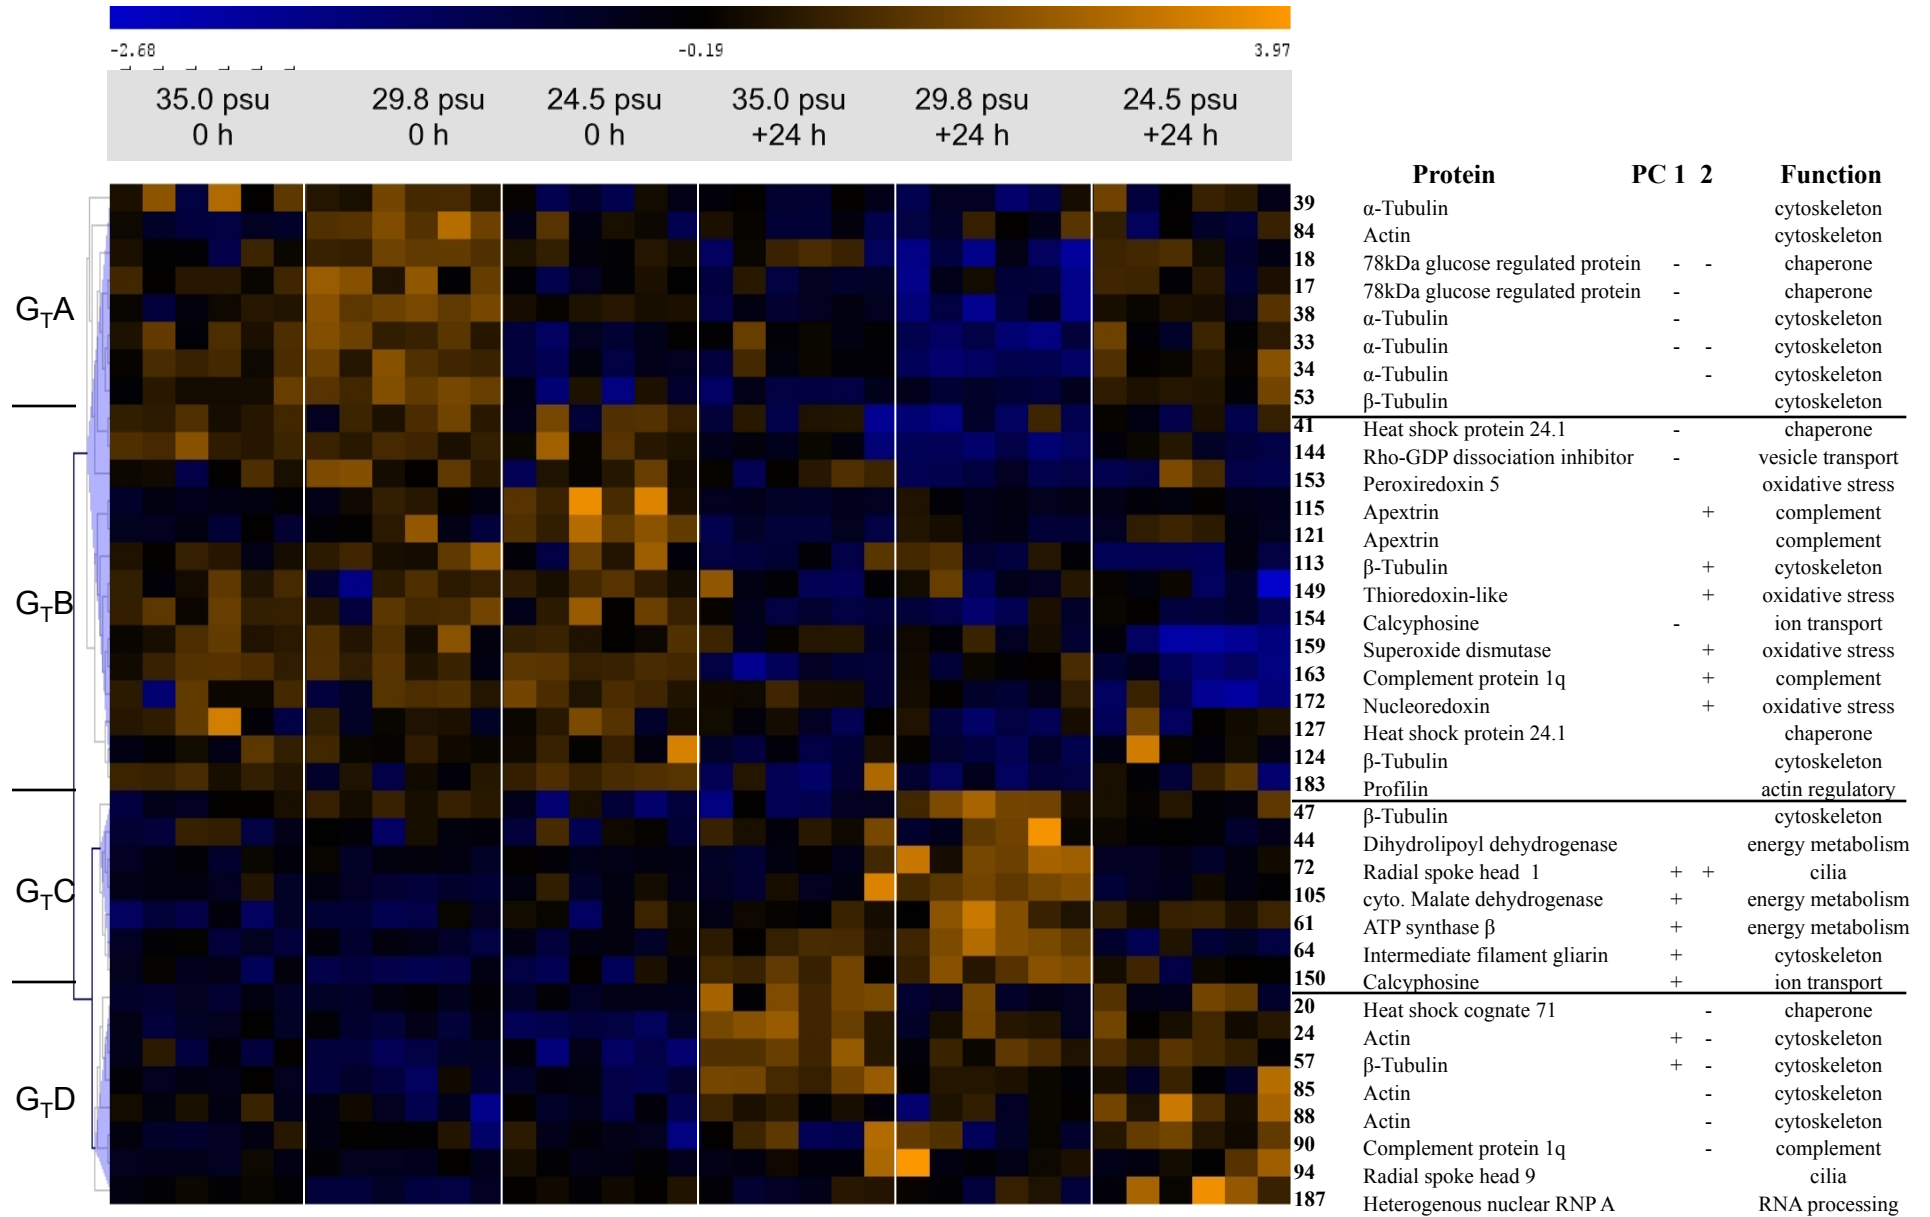



Fig. S4A

(A) *M. trossulus*- Interaction between salinity and recovery

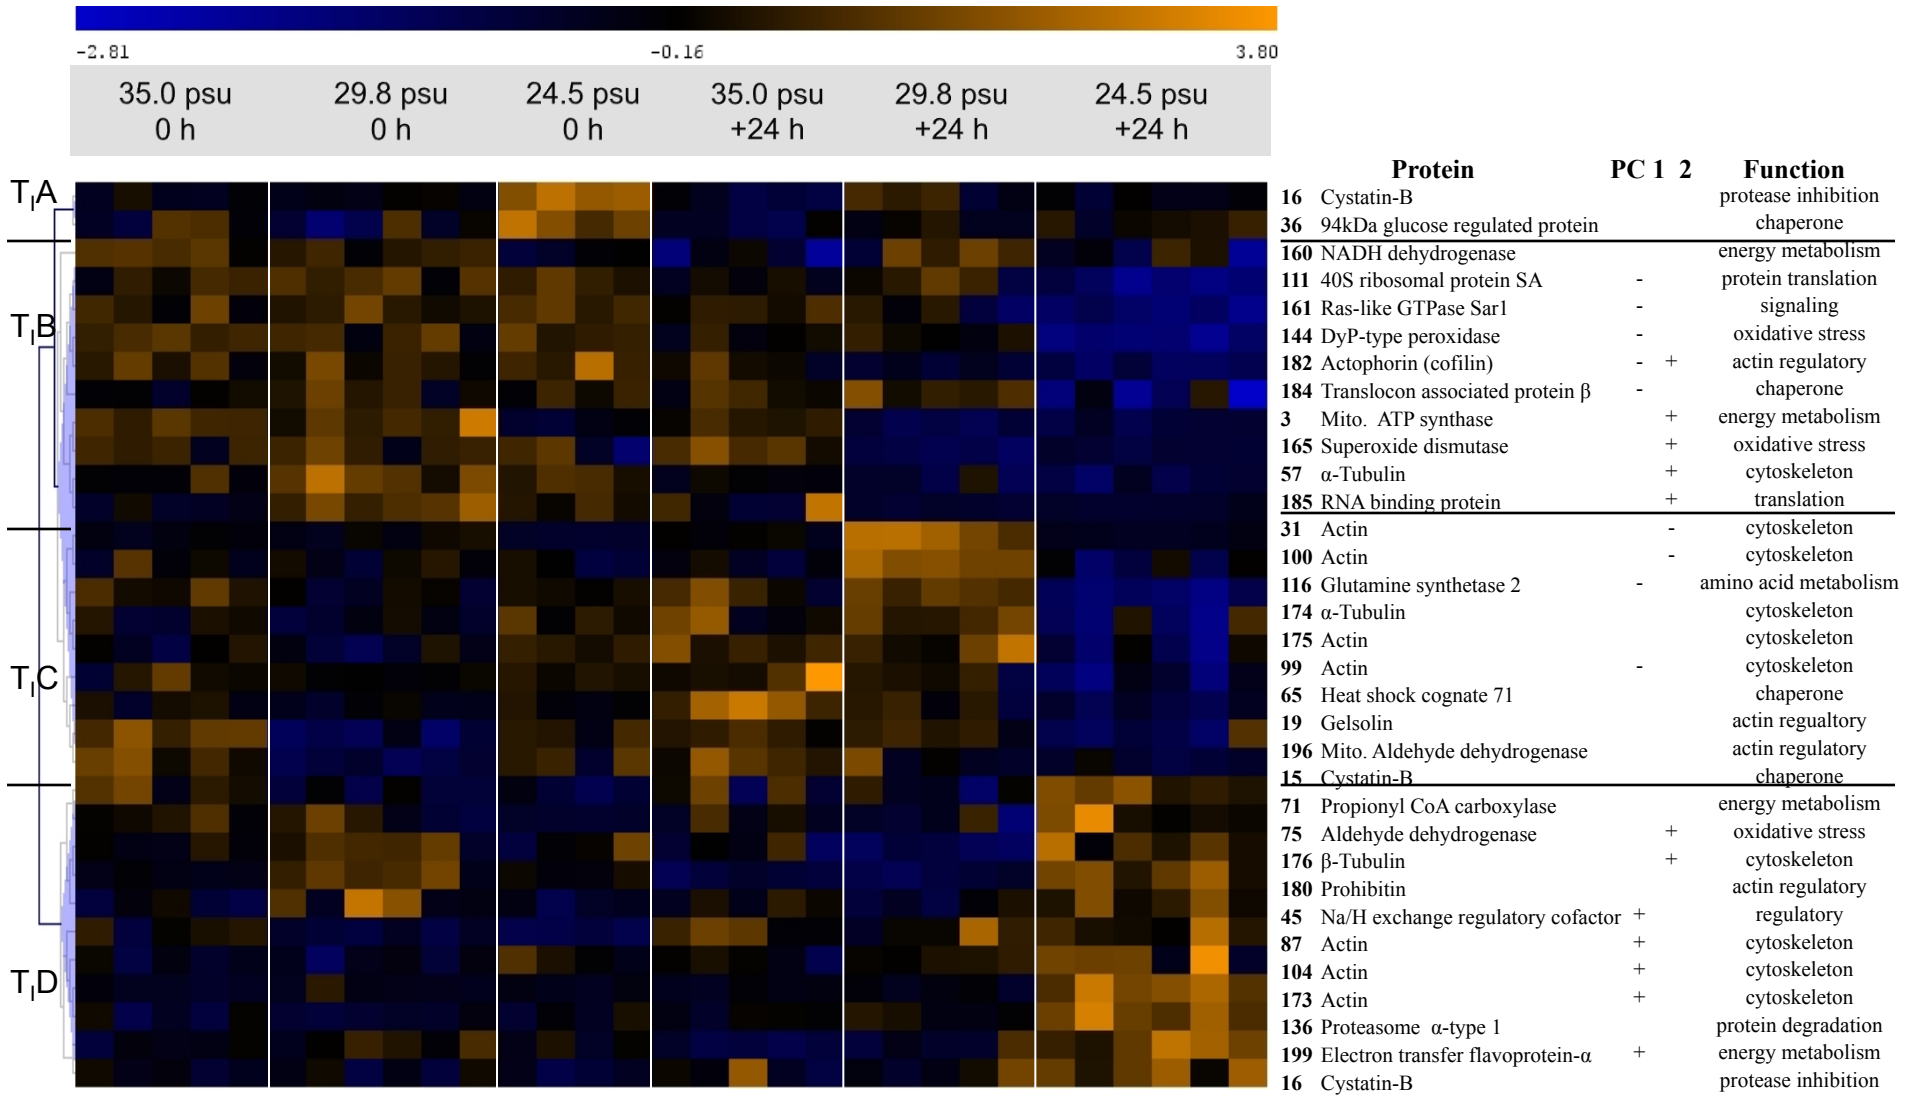

Fig. S4B

(A) *M. galloprovincialis* – Interaction between salinity and recovery

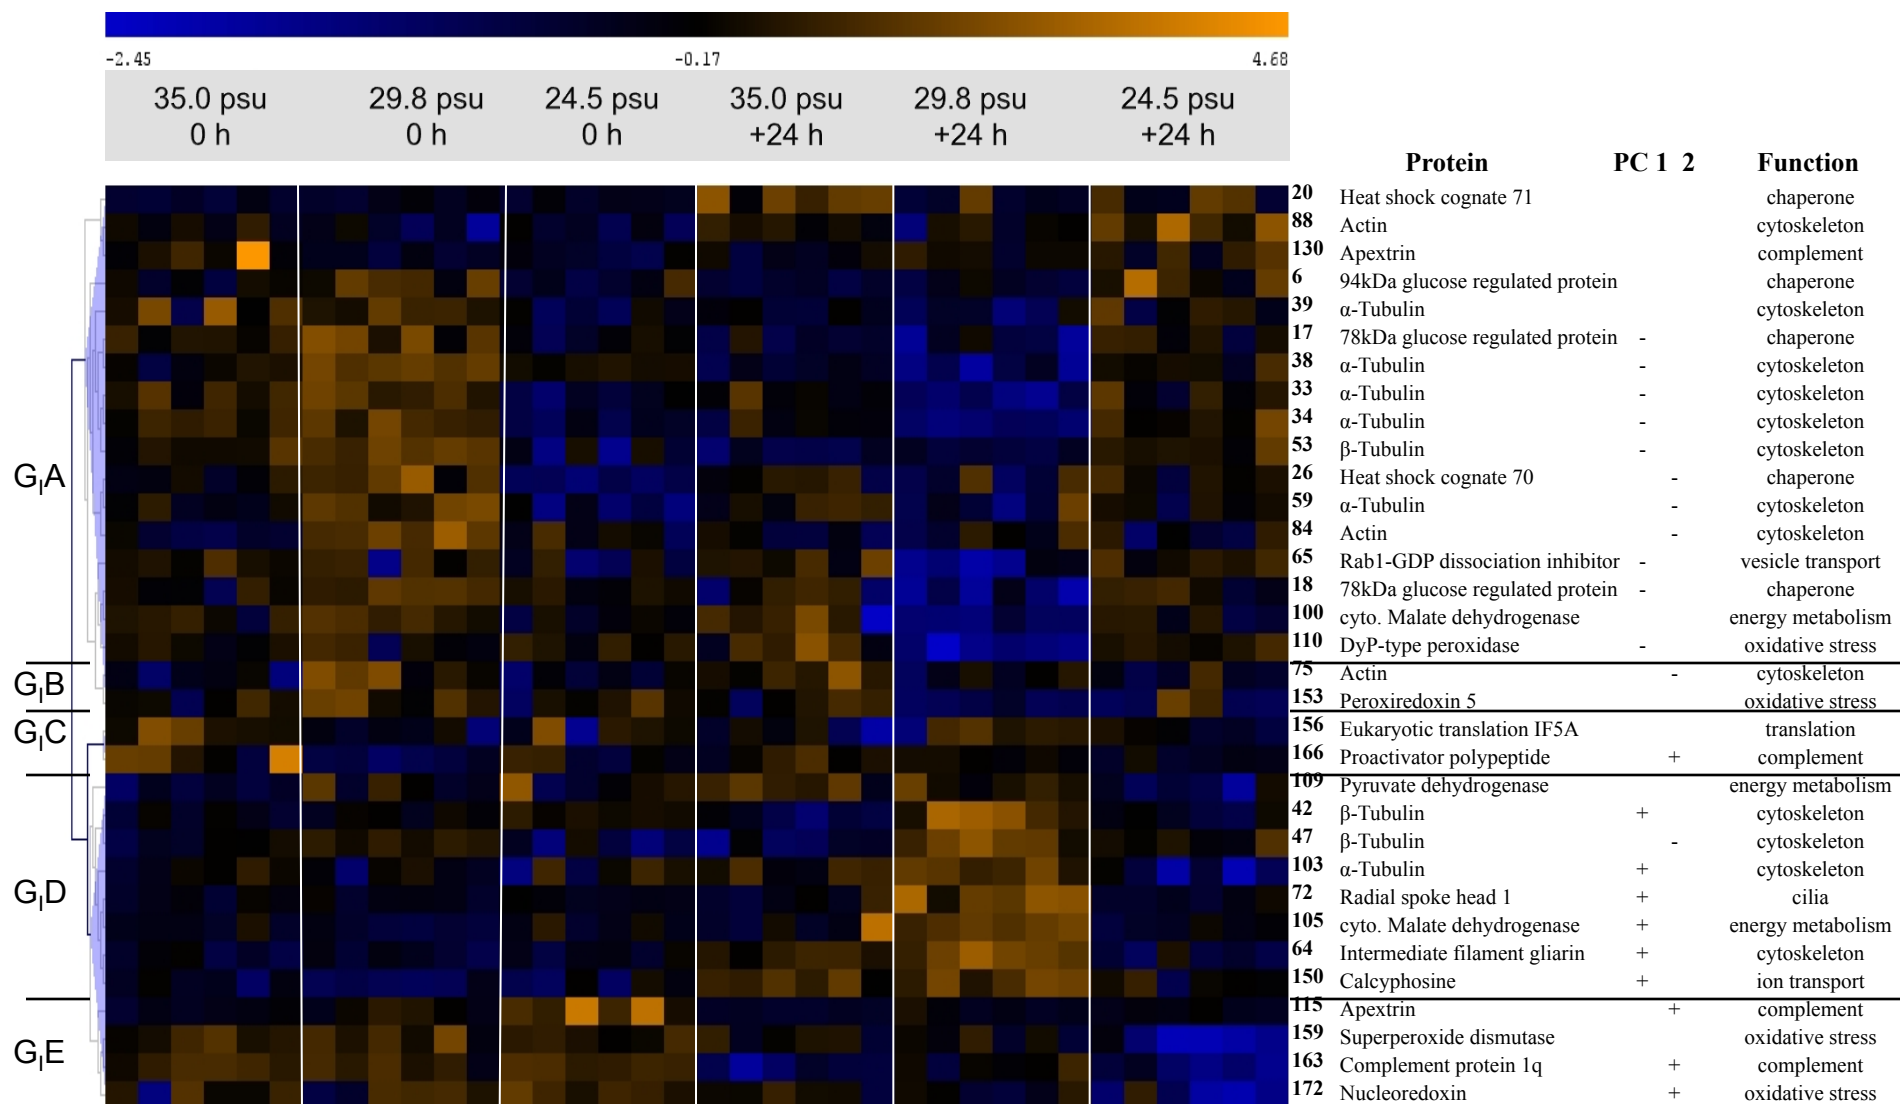

Table S1: Protein identifications for *M. trassulus* with estimated and predicted molecular weight (kDa) and isoelectric point, score, peptide matches, sequence coverage, average levels (NR=no recovery), and putative function.

| Spot ID | Protein ID                                        | MW (kDa)  |           | pI        |           | GenBank ID   | Mascot Score | Peptide Matches | Sequence Coverage(%) | Avg. Levels (relative to 100NR) |        |         |         |         | Functional Category |
|---------|---------------------------------------------------|-----------|-----------|-----------|-----------|--------------|--------------|-----------------|----------------------|---------------------------------|--------|---------|---------|---------|---------------------|
|         |                                                   | Estimated | Predicted | Estimated | Predicted |              |              |                 |                      | 29.8-0                          | 24.5-0 | 35.0-24 | 29.8-24 | 24.5-24 |                     |
| 3       | mitochondrial ATP synthase                        | 18.00     | 4.45      | 17.71     | 5.02      | gii58305969  | 146          | 2               | 11                   | 1.08                            | 0.41   | 0.82    | 0.23    | 0.28    | energy metabolism   |
| 6       | mitochondrial ATP synthase                        | 16.00     | 4.44      | 17.71     | 5.02      | gii58305969  | 96           | 2               | 11                   | 1.90                            | 0.57   | 0.73    | 1.88    | 1.56    | energy metabolism   |
| 14      | Cystatin-B                                        | 16.00     | 5.11      | 11.20     | 5.92      | gii164594924 | 108          | 3               | 31                   | 1.07                            | 1.18   | 0.92    | 0.36    | 0.78    | protease inhibition |
| 15      | Cystatin-B                                        | 15.00     | 5.12      | 11.20     | 5.92      | gii164594924 | 151          | 2               | 20                   | 0.45                            | 0.40   | 0.79    | 0.57    | 1.20    | protease inhibition |
| 16      | Cystatin-B                                        | 15.00     | 5.13      | 11.20     | 5.92      | gii164594924 | 122          | 3               | 38                   | 1.04                            | 4.73   | 0.42    | 1.76    | 0.92    | protease inhibition |
| 17      | cytosolic Malate dehydrogenase                    | 49.00     | 5.89      | 35.50     | 6.01      | gii145901989 | 58           | 2               | 6                    | 0.30                            | 0.56   | 0.85    | 0.80    | 0.46    | energy metabolism   |
| 19      | Gelsolin                                          | 60.00     | 5.79      | 41.20     | 5.13      | gii212814711 | 248          | 2               | 16                   | 0.20                            | 0.68   | 0.73    | 0.69    | 0.30    | actin regulatory    |
| 31      | Actin                                             | 103.00    | 5.25      | 41.60     | 5.3       | gii145892505 | 108          | 2               | 9                    | 1.44                            | 0.08   | 1.35    | 7.26    | 0.59    | cytoskeletal        |
| 33      | 94kDa glucose regulated protein                   | 96.00     | 4.90      | 92.00     | 4.70      | gii238629046 | 73           | 4               | 15                   | 0.56                            | 1.80   | 0.60    | 0.70    | 1.38    | molecular chaperone |
| 36      | 94kDa glucose regulated protein                   | 96.00     | 4.87      | 92.00     | 4.70      | gii238639046 | 101          | 3               | 15                   | 0.65                            | 2.00   | 0.56    | 0.83    | 1.04    | molecular chaperone |
| 45      | Na(+)/H(+) exchange regulatory cofactor (NHE-RF1) | 95.00     | 5.52      | 38.60     | 5.63      | gii238645041 | 55           | 2               | 11                   | 0.30                            | 0.07   | 1.49    | 1.38    | 1.56    | cytoskeletal        |
| 46      | Major vault protein                               | 96.00     | 5.63      | 95.20     | 5.33      | gii223026493 | 78           | 2               | 10                   | 0.86                            | 0.01   | 0.92    | 0.45    | 0.33    | signaling           |
| 54      | 78kDa glucose regulated protein                   | 87.00     | 4.88      | 73.00     | 5.02      | gii238639954 | 122          | 3               | 19                   | 0.32                            | 0.67   | 1.16    | 0.78    | 0.59    | molecular chaperone |
| 57      | $\alpha$ -Tubulin                                 | 81.00     | 5.49      | 30.70     | 5.23      | gii154349830 | 53           | 2               | 11                   | 1.85                            | 1.38   | 0.83    | 0.58    | 0.40    | cytoskeletal        |
| 59      | Major vault protein                               | 83.00     | 4.79      | 95.20     | 5.33      | gii223026493 | 40           | 2               | 11                   | 0.57                            | 0.32   | 0.63    | 0.95    | 0.31    | signaling           |
| 62      | Na(+)/H(+) exchange regulatory cofactor (NHE-RF1) | 82.00     | 4.82      | 38.60     | 5.63      | gii238645041 | 146          | 5               | 28                   | 0.75                            | 0.94   | 0.63    | 1.20    | 0.52    | cytoskeletal        |
| 65      | Heat shock cognate 71                             | 80.00     | 5.30      | 71.20     | 5.28      | gii212812325 | 45           | 2               | 9                    | 0.77                            | 0.98   | 2.30    | 1.11    | 0.46    | molecular chaperone |
| 71      | Propionyl CoA carboxylase                         | 78.00     | 5.37      | 77.40     | 6.48      | gii223020299 | 78           | 2               | 21                   | 0.90                            | 0.54   | 0.84    | 0.60    | 1.35    | energy metabolism   |
| 75      | Aldehyde dehydrogenase                            | 74.00     | 5.55      | 55.60     | 6.69      | gii58307245  | 180          | 3               | 17                   | 1.45                            | 1.14   | 0.88    | 0.43    | 1.58    | oxidative stress    |
| 76      | Actin                                             | 71.00     | 5.29      | 31.40     | 4.94      | gii212827318 | 45           | 2               | 7                    | 1.03                            | 1.05   | 2.30    | 2.43    | 1.20    | cytoskeletal        |
| 82      | Actin                                             | 68.00     | 5.25      | 41.60     | 5.3       | gii145892505 | 188          | 4               | 15                   | 1.38                            | 0.82   | 1.31    | 2.17    | 0.86    | cytoskeletal        |
| 85      | Aldehyde dehydrogenase                            | 69.00     | 5.38      | 55.60     | 6.69      | gii58307245  | 43           | 2               | 9                    | 0.85                            | 1.75   | 0.93    | 0.91    | 2.88    | oxidative stress    |
| 87      | Actin                                             | 68.00     | 5.44      | 17.20     | 5.20      | gii58307494  | 103          | 2               | 8                    | 0.94                            | 1.31   | 1.10    | 1.32    | 1.76    | cytoskeletal        |
| 92      | Dihydrolypoyl dehydrogenase                       | 68.00     | 6.44      | 54.40     | 6.68      | gii145896736 | 105          | 3               | 10                   | 0.97                            | 1.38   | 0.70    | 0.60    | 0.28    | energy metabolism   |
| 99      | Actin                                             | 55.00     | 5.30      | 41.60     | 5.3       | gii145892505 | 246          | 5               | 16                   | 0.89                            | 1.01   | 1.28    | 0.95    | 0.57    | cytoskeletal        |
| 100     | Actin                                             | 61.00     | 5.25      | 41.60     | 5.3       | gii145892505 | 158          | 3               | 10                   | 0.94                            | 0.79   | 0.82    | 2.05    | 0.69    | cytoskeletal        |
| 103     | Rab1 - GDP dissociation inhibitor                 | 59.00     | 6.22      | 50.20     | 5.31      | gii58306730  | 121          | 4               | 28                   | 1.09                            | 1.54   | 1.04    | 1.11    | 2.02    | vesicle transport   |
| 104     | Actin                                             | 57.00     | 5.40      | 41.60     | 5.3       | gii145892505 | 359          | 6               | 21                   | 1.36                            | 1.15   | 1.18    | 1.19    | 5.15    | cytoskeletal        |
| 106     | Isocitrate dehydrogenase (NADP)                   | 56.00     | 6.54      | 50.85     | 8.52      | gii223026036 | 115          | 2               | 7                    | 0.71                            | 0.93   | 0.78    | 0.37    | 0.20    | oxidative stress    |
| 111     | 40S ribosomal protein SA                          | 56.00     | 4.63      | 24.18     | 7.66      | gii58307365  | 206          | 5               | 28                   | 1.16                            | 1.12   | 0.79    | 0.98    | 0.32    | translation         |
| 116     | Glutamine synthetase 2                            | 56.00     | 6.11      | 41.50     | 6.03      | gii145886483 | 158          | 3               | 18                   | 0.70                            | 0.85   | 0.99    | 1.17    | 0.37    | nitrogen metabolism |
| 136     | Proteasome $\alpha$ -type 1                       | 43.00     | 5.35      | 30.70     | 5.23      | gii145888141 | 79           | 3               | 14                   | 1.33                            | 1.11   | 0.73    | 1.04    | 2.05    | protein degradation |
| 140     | mitochondrial Malate dehydrogenase                | 44.00     | 6.53      | 36.30     | 8.70      | gii223024468 | 85           | 2               | 10                   | 0.69                            | 0.84   | 0.66    | 0.37    | 0.37    | energy metabolism   |
| 144     | DyP-type peroxidase                               | 41.00     | 6.37      | 45.00     | 5.49      | gii238638759 | 246          | 6               | 35                   | 0.89                            | 0.96   | 0.70    | 0.75    | 0.17    | oxidative stress    |
| 150     | Isocitrate dehydrogenase (NADP)                   | 39.00     | 6.57      | 50.85     | 8.52      | gii223026036 | 126          | 4               | 20                   | 0.91                            | 0.61   | 0.90    | 0.24    | 0.30    | energy metabolism   |
| 160     | NADH dehydrogenase                                | 33.00     | 4.75      | 23.80     | 5.74      | gii223028674 | 79           | 2               | 14                   | 0.92                            | 0.75   | 0.65    | 0.97    | 0.74    | oxidative stress    |
| 161     | Ras-like GTPase Sar1                              | 27.00     | 6.43      | 21.79     | 6.52      | gii145895499 | 108          | 4               | 12                   | 1.04                            | 1.17   | 0.99    | 0.70    | 0.25    | vesicle transport   |
| 165     | Superoxide dismutase                              | 18.00     | 6.26      | 15.80     | 5.85      | gii154349389 | 98           | 3               | 12                   | 1.07                            | 0.77   | 1.26    | 0.27    | 0.42    | oxidative stress    |
| 173     | Actin                                             | 57.00     | 5.50      | 41.60     | 5.3       | gii145892505 | 220          | 6               | 21                   | 0.80                            | 1.22   | 1.29    | 1.56    | 3.82    | cytoskeletal        |
| 174     | $\alpha$ -Tubulin                                 | 61.00     | 5.65      | 49.98     | 4.97      | gii238782438 | 210          | 4               | 22                   | 0.86                            | 1.25   | 1.32    | 1.47    | 0.72    | cytoskeletal        |
| 175     | Actin                                             | 62.00     | 5.54      | 41.60     | 5.3       | gii145892505 | 243          | 5               | 18                   | 0.87                            | 1.39   | 1.55    | 1.68    | 0.68    | cytoskeletal        |
| 176     | $\beta$ -Tubulin                                  | 45.00     | 5.62      | 27.80     | 4.81      | gii145889387 | 69           | 2               | 10                   | 2.00                            | 1.25   | 0.57    | 0.54    | 2.39    | cytoskeletal        |
| 178     | F-actin capping protein- $\beta$                  | 38.00     | 5.06      | 30.79     | 5.45      | gii321468824 | 100          | 3               | 11                   | 0.52                            | 1.90   | 1.13    | 1.69    | 2.21    | actin regulatory    |
| 180     | Prohibitin                                        | 39.00     | 5.38      | 29.90     | 5.36      | gii238643256 | 221          | 6               | 25                   | 2.42                            | 0.94   | 1.58    | 1.12    | 2.44    | molecular chaperone |
| 182     | Actophorin (cofilin)                              | 18.00     | 6.46      | 16.15     | 5.94      | gii212817000 | 85           | 2               | 13                   | 0.95                            | 1.25   | 0.82    | 0.44    | 0.23    | actin regulatory    |
| 184     | Translocon associated protein $\beta$             | 31.00     | 5.74      | 20.00     | 8.64      | gii223024827 | 168          | 2               | 11                   | 1.22                            | 1.20   | 1.21    | 1.38    | 0.62    | molecular chaperone |
| 185     | RNA binding protein                               | 14.00     | 5.91      | 110.16    | 6.93      | gii164573751 | 105          | 4               | 15                   | 5.72                            | 3.22   | 3.26    | 0.24    | 0.39    | RNA binding         |
| 189     | Translationally controlled tumor protein          | 29.00     | 4.72      | 22.39     | 5.48      | gii223020329 | 108          | 5               | 21                   | 0.53                            | 0.68   | 1.11    | 1.01    | 1.29    | molecular chaperone |
| 190     | Fatty acid binding protein                        | 21.00     | 4.67      | 13.80     | 6.58      | gii223024166 | 99           | 4               | 21                   | 0.80                            | 1.55   | 1.07    | 0.25    | 0.73    | fatty acid transfer |
| 191     | Fatty acid binding protein                        | 20.00     | 4.67      | 13.80     | 6.58      | gii223024166 | 49           | 4               | 21                   | 2.87                            | 2.00   | 1.06    | 1.98    | 1.15    | fatty acid transfer |
| 193     | Guanine nucleotide binding protein- $\beta$       | 45.00     | 5.94      | 37.30     | 5.76      | gii223020331 | 176          | 6               | 15                   | 0.59                            | 0.85   | 0.93    | 0.79    | 1.25    | signaling           |
| 196     | mitochondrial Aldehyde dehydrogenase              | 64.00     | 6.00      | 57.10     | 7.53      | gii145898855 | 86           | 3               | 10                   | 0.25                            | 0.82   | 1.02    | 0.63    | 0.37    | oxidative stress    |
| 199     | Electron transfer flavoprotein- $\alpha$          | 41.00     | 5.92      | 35.00     | 7.74      | gii58307490  | 188          | 4               | 32                   | 0.97                            | 0.61   | 1.50    | 1.51    | 2.86    | energy metabolism   |

Table S2: Protein identifications for *M. galloprovincialis* with estimated and predicted molecular weight (kDa) and isoelectric point, score, peptide matches, sequence coverage, average levels (NR=no recovery), and putative function.

| Spot ID | Protein ID                                         | MW (kDa)  |           | pI        |           | GenBank ID    | Mascot Score | Peptide Matches | Sequence Coverage(%) | Avg. Levels (relative to 100 NR) |        |         |        |         | Functional Category  |
|---------|----------------------------------------------------|-----------|-----------|-----------|-----------|---------------|--------------|-----------------|----------------------|----------------------------------|--------|---------|--------|---------|----------------------|
|         |                                                    | Estimated | Predicted | Estimated | Predicted |               |              |                 |                      | 29.8-0                           | 24.5-0 | 35.0-24 | 29.8-2 | 24.5-24 |                      |
| 2       | Major vault protein                                | 96.00     | 5.85      | 95.20     | 5.33      | gi 223026493  | 88           | 3               | 13                   | 0.83                             | 1.03   | 1.52    | 0.49   | 1.47    | signaling            |
| 6       | 94kDa glucose regulated protein                    | 96.00     | 5.07      | 92.00     | 4.70      | gi 238629046  | 92           | 4               | 15                   | 2.55                             | 0.86   | 0.35    | 0.55   | 2.63    | molecular chaperone  |
| 17      | 78kDa glucose regulated protein                    | 84.00     | 5.04      | 73.00     | 5.02      | gi 238639954  | 189          | 4               | 24                   | 1.39                             | 0.69   | 0.61    | 0.44   | 0.92    | molecular chaperone  |
| 18      | 78kDa glucose regulated protein                    | 83.00     | 5.07      | 73.00     | 5.02      | gi 238639954  | 136          | 4               | 24                   | 1.57                             | 1.10   | 1.02    | 0.38   | 1.17    | molecular chaperone  |
| 20      | Heat shock cognate 71                              | 81.00     | 5.54      | 71.20     | 5.28      | gi 149382715  | 127          | 3               | 18                   | 1.40                             | 1.33   | 5.51    | 1.91   | 3.37    | molecular chaperone  |
| 21      | Chaperonin containing TCP1 subunit 2 (β) variant 1 | 80.00     | 6.04      | 29.30     | 8.86      | gi 149381836  | 52           | 2               | 8                    | 0.56                             | 0.61   | 0.73    | 0.42   | 0.69    | molecular chaperone  |
| 24      | Actin                                              | 76.00     | 5.51      | 41.70     | 5.30      | gi 145892505  | 238          | 6               | 21                   | 0.96                             | 0.61   | 2.69    | 1.65   | 1.89    | cytoskeletal         |
| 26      | Heat shock cognate 70                              | 76.00     | 5.58      | 35.00     | 5.35      | gi 58307085   | 67           | 2               | 13                   | 1.76                             | 0.43   | 1.13    | 0.97   | 1.16    | molecular chaperone  |
| 33      | α-Tubulin                                          | 68.00     | 5.30      | 50.00     | 4.97      | gi 238782438  | 451          | 6               | 25                   | 1.14                             | 0.59   | 0.83    | 0.42   | 0.89    | cytoskeletal         |
| 34      | α-Tubulin                                          | 69.00     | 5.26      | 30.70     | 5.23      | gi 145887917  | 204          | 2               | 4                    | 1.21                             | 0.46   | 0.70    | 0.24   | 0.98    | cytoskeletal         |
| 38      | α-Tubulin                                          | 69.00     | 5.12      | 50.00     | 4.97      | gi 238782438  | 492          | 6               | 25                   | 1.72                             | 1.12   | 0.77    | 0.48   | 1.12    | cytoskeletal         |
| 39      | α-Tubulin                                          | 69.00     | 5.33      | 50.00     | 4.97      | gi 238782438  | 590          | 7               | 27                   | 0.96                             | 0.47   | 0.52    | 0.39   | 0.76    | cytoskeletal         |
| 41      | Heat shock protein 24.1                            | 70.00     | 6.00      | 28.50     | 5.61      | gi 2387642855 | 128          | 3               | 21                   | 1.00                             | 0.98   | 0.64    | 0.48   | 0.70    | molecular chaperone  |
| 42      | β-Tubulin                                          | 62.00     | 5.06      | 43.20     | 5.76      | gi 164592164  | 300          | 7               | 25                   | 1.05                             | 1.16   | 0.92    | 1.50   | 1.00    | cytoskeletal         |
| 44      | Dihydropyridyl dehydrogenase                       | 67.00     | 6.47      | 53.90     | 6.68      | gi 196005079  | 120          | 2               | 4                    | 0.96                             | 0.99   | 1.44    | 1.69   | 1.00    | energy metabolism    |
| 45      | Protein disulfide isomerase                        | 66.00     | 4.73      | 56.70     | 4.70      | gi 212819041  | 329          | 5               | 24                   | 1.12                             | 0.76   | 0.76    | 0.98   | 0.90    | molecular chaperone  |
| 47      | β-Tubulin                                          | 64.00     | 4.98      | 43.20     | 5.76      | gi 164592164  | 197          | 5               | 20                   | 1.30                             | 0.83   | 0.81    | 1.64   | 1.20    | cytoskeletal         |
| 52      | β-Tubulin                                          | 65.00     | 4.90      | 27.80     | 4.81      | gi 145889387  | 129          | 3               | 13                   | 1.24                             | 0.72   | 0.82    | 1.30   | 0.94    | cytoskeletal         |
| 53      | β-Tubulin                                          | 66.00     | 4.94      | 51.40     | 4.77      | gi 145890511  | 270          | 5               | 20                   | 1.43                             | 0.60   | 0.51    | 0.57   | 1.06    | cytoskeletal         |
| 57      | β-Tubulin                                          | 61.00     | 5.12      | 50.00     | 4.79      | gi 238638721  | 127          | 6               | 18                   | 0.78                             | 0.71   | 1.69    | 1.39   | 1.45    | cytoskeletal         |
| 59      | α-Tubulin                                          | 65.00     | 5.30      | 50.00     | 4.97      | gi 238782438  | 510          | 6               | 25                   | 1.53                             | 0.67   | 1.18    | 0.88   | 1.02    | cytoskeletal         |
| 61      | ATP synthase β                                     | 60.00     | 5.01      | 56.60     | 5.38      | gi 212812392  | 587          | 7               | 38                   | 1.06                             | 1.29   | 1.35    | 1.82   | 1.53    | energy metabolism    |
| 64      | Intermediate filament gliarin                      | 62.00     | 5.28      | 71.30     | 5.39      | gi 212812257  | 155          | 4               | 18                   | 0.99                             | 1.06   | 1.62    | 2.33   | 0.93    | cytoskeletal         |
| 65      | Rab1 - GDP dissociation inhibitor                  | 60.00     | 6.52      | 50.20     | 5.31      | gi 58306730   | 146          | 4               | 28                   | 0.98                             | 0.78   | 1.07    | 0.55   | 1.05    | vesicle transport    |
| 72      | Radial spoke head 1                                | 59.00     | 4.70      | 35.00     | 4.51      | gi 145223031  | 134          | 2               | 7                    | 0.99                             | 1.04   | 1.15    | 3.70   | 0.94    | cytoskeletal         |
| 75      | Actin                                              | 56.00     | 5.56      | 41.70     | 5.30      | gi 145892505  | 190          | 2               | 9                    | 1.99                             | 1.05   | 1.83    | 1.24   | 1.20    | cytoskeletal         |
| 81      | 40S ribosomal protein SA                           | 54.00     | 4.83      | 33.50     | 5.24      | gi 58307365   | 168          | 5               | 28                   | 0.57                             | 0.95   | 0.85    | 0.23   | 1.14    | translation          |
| 82      | Actin                                              | 53.00     | 5.60      | 41.70     | 5.30      | gi 145892505  | 214          | 5               | 18                   | 1.42                             | 0.99   | 1.02    | 1.26   | 1.06    | cytoskeletal         |
| 84      | Actin                                              | 52.00     | 5.41      | 41.70     | 5.30      | gi 145892505  | 224          | 5               | 18                   | 2.33                             | 1.33   | 1.09    | 1.34   | 1.21    | cytoskeletal         |
| 85      | Actin                                              | 52.00     | 5.37      | 31.40     | 4.94      | gi 212827318  | 149          | 3               | 11                   | 0.83                             | 0.85   | 1.89    | 1.23   | 1.35    | cytoskeletal         |
| 86      | 40S ribosomal protein SA                           | 52.00     | 4.83      | 33.50     | 5.24      | gi 58307365   | 201          | 5               | 28                   | 1.96                             | 0.82   | 0.93    | 2.17   | 1.20    | translation          |
| 88      | Actin                                              | 51.00     | 5.42      | 41.70     | 5.30      | gi 145892505  | 197          | 3               | 10                   | 0.79                             | 0.82   | 1.07    | 0.94   | 1.43    | cytoskeletal         |
| 90      | Complement component 1q                            | 47.00     | 5.10      | 26.90     | 5.09      | gi 58308171   | 259          | 4               | 25                   | 1.02                             | 0.93   | 1.43    | 1.20   | 1.72    | complement           |
| 94      | Radial spoke head 9                                | 50.00     | 6.10      | 31.20     | 5.41      | gi 223025866  | 190          | 5               | 18                   | 0.97                             | 1.68   | 3.88    | 5.41   | 4.98    | cytoskeletal         |
| 99      | Squid, isoform C                                   | 47.00     | 5.59      | 33.00     | 6.47      | gi 58307067   | 53           | 2               | 6                    | 1.37                             | 0.60   | 1.06    | 1.20   | 0.56    | translation          |
| 100     | cytosolic Malate dehydrogenase                     | 47.00     | 6.39      | 36.40     | 6.02      | gi 223021440  | 221          | 5               | 17                   | 1.15                             | 0.84   | 1.04    | 0.57   | 0.90    | energy metabolism    |
| 101     | F-actin capping protein -α                         | 46.00     | 6.53      | 38.00     | 5.76      | gi 223022543  | 113          | 2               | 14                   | 0.70                             | 0.88   | 1.08    | 0.73   | 1.12    | actin regulatory     |
| 102     | Radial spoke head 9                                | 45.00     | 6.14      | 31.20     | 5.41      | gi 223025866  | 93           | 2               | 12                   | 0.71                             | 0.86   | 0.92    | 0.52   | 0.83    | cytoskeletal         |
| 103     | α-Tubulin                                          | 46.00     | 6.00      | 30.70     | 5.23      | gi 154349830  | 169          | 4               | 19                   | 0.91                             | 1.01   | 1.16    | 1.40   | 0.67    | cytoskeletal         |
| 105     | cytosolic Malate dehydrogenase                     | 45.00     | 6.10      | 36.40     | 6.02      | gi 145901989  | 60           | 2               | 6                    | 0.54                             | 1.20   | 1.71    | 3.38   | 0.91    | energy metabolism    |
| 109     | Pyruvate dehydrogenase                             | 43.00     | 5.59      | 39.40     | 5.52      | gi 212834721  | 109          | 3               | 10                   | 1.27                             | 1.32   | 1.50    | 1.40   | 0.97    | energy metabolism    |
| 110     | TyrA (Dyp-type peroxidase)                         | 42.00     | 6.56      | 41.62     | 7.00      | gi 145886780  | 150          | 3               | 12                   | 1.00                             | 1.07   | 1.20    | 0.48   | 1.10    | oxidative stress     |
| 113     | β-Tubulin                                          | 40.00     | 5.23      | 54.40     | 4.92      | gi 145889387  | 87           | 2               | 9                    | 1.29                             | 1.11   | 0.74    | 0.96   | 0.50    | cytoskeletal         |
| 115     | Apexrin                                            | 40.00     | 6.22      | 24.30     | 8.42      | gi 238641395  | 245          | 6               | 21                   | 2.41                             | 7.82   | 0.50    | 1.38   | 1.19    | immune response      |
| 121     | Apexrin                                            | 38.00     | 6.21      | 24.30     | 8.42      | gi 238641395  | 260          | 5               | 18                   | 1.68                             | 3.02   | 0.71    | 1.20   | 1.59    | immune response      |
| 124     | β-Tubulin                                          | 37.00     | 5.25      | 43.20     | 5.76      | gi 164592164  | 250          | 7               | 25                   | 1.04                             | 1.34   | 0.54    | 0.41   | 1.11    | cytoskeletal         |
| 127     | Heat shock protein 24.1                            | 36.00     | 5.95      | 28.50     | 5.61      | gi 212814271  | 125          | 3               | 13                   | 0.67                             | 0.89   | 0.53    | 0.39   | 0.62    | molecular chaperones |
| 129     | Apexrin                                            | 35.00     | 5.91      | 24.30     | 8.42      | gi 238641395  | 51           | 4               | 15                   | 0.77                             | 0.29   | 0.49    | 0.55   | 0.40    | immune response      |
| 130     | Apexrin                                            | 35.00     | 5.87      | 24.30     | 8.42      | gi 238641395  | 59           | 2               | 6                    | 0.32                             | 0.32   | 0.44    | 0.61   | 0.78    | immune response      |
| 139     | NADH dehydrogenase                                 | 32.00     | 5.14      | 23.80     | 5.74      | gi 223028674  | 125          | 3               | 12                   | 0.97                             | 0.77   | 0.71    | 1.18   | 0.63    | energy metabolism    |
| 144     | Rho - GDP dissociation inhibitor                   | 30.00     | 5.15      | 23.20     | 5.01      | gi 149382257  | 68           | 2               | 12                   | 0.89                             | 0.91   | 0.48    | 0.22   | 0.53    | signaling            |
| 149     | Thioredoxin-like superfamily                       | 25.00     | 4.71      | 26.00     | 4.15      | gi 238645469  | 203          | 3               | 14                   | 0.90                             | 1.02   | 0.85    | 0.88   | 0.71    | oxidative stress     |
| 150     | Calcyphosine                                       | 25.00     | 5.71      | 21.40     | 4.99      | gi 238642964  | 136          | 3               | 13                   | 0.51                             | 0.91   | 2.61    | 3.19   | 1.55    | signaling            |
| 153     | Peroxisome oxidoreductin 5                         | 22.00     | 6.64      | 19.87     | 8.88      | gi 212815268  | 145          | 2               | 8                    | 1.61                             | 1.10   | 1.09    | 0.31   | 0.81    | oxidative stress     |
| 154     | Calcyphosine                                       | 22.00     | 5.70      | 21.40     | 4.99      | gi 238642964  | 209          | 8               | 33                   | 0.98                             | 0.99   | 0.56    | 0.51   | 0.57    | signaling            |
| 156     | Eukaryotic translation initiation factor 5A        | 21.00     | 5.49      | 17.00     | 5.30      | gi 37650329   | 144          | 4               | 17                   | 0.80                             | 0.90   | 0.79    | 0.94   | 0.82    | translation          |
| 159     | Superoxide dismutase                               | 19.00     | 6.10      | 15.80     | 5.84      | gi 154349389  | 425          | 5               | 23                   | 1.05                             | 0.96   | 0.83    | 0.78   | 0.31    | oxidative stress     |
| 163     | Complement component 1q                            | 18.00     | 6.43      | 19.50     | 5.64      | gi 238646846  | 112          | 4               | 29                   | 0.95                             | 1.05   | 0.48    | 0.77   | 0.44    | complement           |
| 166     | Proactivator polypeptide                           | 17.00     | 4.53      | 61.30     | 4.90      | gi 223023145  | 80           | 2               | 11                   | 0.19                             | 0.53   | 0.64    | 0.54   | 0.39    | complement           |
| 172     | Nucleoredoxin                                      | 16.00     | 5.34      | 46.70     | 4.86      | gi 145896033  | 51           | 2               | 9                    | 1.05                             | 1.22   | 0.95    | 0.85   | 0.50    | oxidative stress     |
| 181     | Myosin light chain 1                               | 13.00     | 4.38      | 20.63     | 4.69      | gi 164595445  | 227          | 3               | 24                   | 0.25                             | 1.82   | 0.42    | 0.63   | 0.95    | cytoskeletal         |
| 183     | Profilin                                           | 12.00     | 6.87      | 15.27     | 6.10      | gi 37650202   | 209          | 4               | 17                   | 0.62                             | 1.16   | 0.59    | 0.27   | 0.68    | actin regulatory     |
| 184     | Myosin light chain 1                               | 13.00     | 4.47      | 20.63     | 4.69      | gi 164595445  | 156          | 3               | 24                   | 0.42                             | 1.95   | 0.64    | 0.53   | 0.92    | cytoskeletal         |
| 187     | Heterogenous nuclear ribonucleoprotein A           | 11.00     | 4.98      | 31.45     | 6.14      | gi 37649755   | 116          | 4               | 22                   | 0.31                             | 1.19   | 0.95    | 0.99   | 2.74    | translation          |
